## Regulation of RXFP1 expression in IPF

RXFP1 expression is regulated by miR-144-3p in Fibroblasts from Patients with Idiopathic Pulmonary Fibrosis

Harinath Bahudhanapati<sup>§</sup>, Jiangning Tan<sup>§</sup>, Justin A Dutta, Stephen B Strock, Yingze Zhang and Daniel J Kass

Running title: *Regulation of RXFP1 expression in IPF*

From Simmons Center for Interstitial Lung Disease, Division of Pulmonary, Allergy and Critical Care Medicine University of Pittsburgh School of Medicine, Pittsburgh, PA-15213.

To whom all correspondence should be addressed: Simmons Center for Interstitial Lung Disease. Division of Pulmonary, Allergy, and Critical Care Medicine. University of Pittsburgh School of Medicine, 200 Lothrop St, Pittsburgh. Tel.: 412-624-7444; Fax: 412-624-1670; E-mail: [kassd2@upmc.edu](mailto:kassd2@upmc.edu)

**Keywords:** RXFP1, lung fibroblasts, IPF, microRNA

---

### ABSTRACT

Relaxin has been considered as a potential therapy for patients with pulmonary fibrosis. We have previously shown, however, that a potential limitation of relaxin-based therapy for Idiopathic Pulmonary Fibrosis (IPF) is the loss of expression of the relaxin receptor Relaxin/Insulin Like Receptor 1 (RXFP1) expression in fibroblasts. The molecular mechanism for RXFP1 down-regulation in IPF patients remains unclear. To determine whether microRNAs play a role in RXFP1 gene expression, we employed a bioinformatics approach to identify microRNAs (miRs) that are predicted to target RXFP1. By *in silico* analysis, we identified a putative target site in the RXFP1 mRNA for the miR-144 family. We found that miR-144-3p was upregulated in IPF fibroblasts compared to donor lung fibroblast controls. Forced miR-144-3p mimic expression reduced RXFP1 mRNA and protein levels and increased expression of the myofibroblast marker alpha-smooth muscle actin ( $\alpha$ -SMA) in donor lung fibroblasts. IPF lung fibroblasts transfected with a miR-144-3p inhibitor increased RXFP1 expression and reduced  $\alpha$ -SMA expression. A lentiviral luciferase reporter vector carrying the WT 3'UTR of RXFP1 was repressed more in lung fibroblasts whereas vector carrying a mutated miR-144-3p binding site exhibited less sensitivity to endogenous miR-144-3p expression,

suggesting that RXFP1 is a direct target of miR-144-3p. Thus, miR-144-3p is highly expressed in IPF fibroblasts and acts as a negative regulator of RXFP1 protein expression.

---

Idiopathic Pulmonary Fibrosis (IPF) is a chronic, debilitating, and progressive scarring of the lung parenchyma which ultimately compromises gas exchange and progresses to respiratory failure and death in many by four years after the diagnosis (1,2). The hallmark of fibrosis, which is shared by all organs, is the dysregulated, and seemingly unending, architectural destruction caused by the accumulation of activated fibroblasts and the deposition of extracellular matrix. Multiple lines of evidence have suggested that the hormone relaxin is a potentially powerful inhibitor of fibrosis (3,4). These include the seminal observation that mice genetically engineered to lose expression of the hormone relaxin (encoded in humans by RLN2) developed a progressive, age-related multi-organ fibrosis that was reversible with exogenous relaxin (4-6). In further support of the importance of this pathway, we have shown that gene expression levels for the relaxin receptor, RXFP1, in IPF is directly associated with pulmonary function (7). Furthermore, RXFP1 protein expression was dramatically decreased in both IPF lungs and IPF lung fibroblasts compared to donor controls. Because the loss of RXFP1

## Regulation of RXFP1 expression in IPF

expression in IPF may desensitize fibroblasts from the positive effects of relaxin-like agonists (7), a strategy to increase RXFP1 expression in IPF might prove to be an effective therapeutic approach.

Little is known, however, about the transcriptional regulation of RXFP1 expression. Certain endocrine signals have been associated with RXFP1 expression. For example, estrogen and progesterone treatment increase RXFP1 expression in ligamentous tissue from ovariectomized female rats (8). Alpha, but not  $\beta$ 2 adrenergic stimulation of cardiac myocytes increases expression of RXFP1 (9). We and others have shown TGF $\beta$  stimulation can lead to decreased RXFP1 expression (7,10). Further highlighting the heterogeneity of fibrosis in different organs, increased RXFP1 expression has been observed in liver fibrosis (11,12). To our knowledge, there are no data on the regulation of RXFP1 by particular transcription factors.

One relatively unexplored mechanism to regulate RXFP1 expression is the role of microRNAs. MicroRNAs are noncoding small RNAs, about 22 nucleotides in length, that can bind to the 3' UTR of target genes to repress their translation and/or induce degradation of target gene mRNA by incomplete base pairing. Dysregulation of miRNAs such as miR-29 (13), miR-21 (14), miR-155 (15), let-7d (16), miR-30 (17), and miR-133a (18) has been implicated in the pathogenesis of pulmonary fibrosis. Only synthetic microRNAs have been associated with regulation of RXFP1 expression (19). In this study, we tested the hypothesis that dysregulation of microRNA expression in IPF fibroblasts regulates RXFP1 gene expression.

## RESULTS

*miR-144-3p is upregulated in lung fibroblasts from IPF patients*—We have previously shown that loss of RXFP1 at the level of mRNA in IPF is associated with more impaired pulmonary function in patients. To understand potential mechanisms that may regulate RXFP1 transcription in lung fibroblasts, the principal

effector cells in fibrosis, we employed several public database prediction programs to identify potential microRNA species that may regulate RXFP1 gene expression. Using the miRanda (microrna.org) and Targetscan 7.0 online databases, we identified a putative miR-144-3p targeting site in the 3'UTR of human RXFP1 mRNA (Fig 1A). While miR-144-3p is highly conserved in primates and lower vertebrates, the RXFP1 target site for miR-144-3p is conserved only among human, chimpanzee, rhesus, bovine and rat genomes. MiR-144-3p is predicted to have strong homology with the 3'UTR of RXFP1 mRNA. We chose miR-144-3p for further testing.

First we determined the levels of miR-144-3p in IPF and donor lung fibroblasts using quantitative RT-PCR with and without TGF $\beta$  stimulation. We found that fibroblasts derived from IPF lungs showed greater than 50-fold higher miR-144-3p compared to donor lung fibroblast controls ( $p < 0.05$  for significant effects of disease origin, by two-way ANOVA, N=3). TGF $\beta$  stimulation increased expression of miR-144-3p in donor lung fibroblasts but not in IPF fibroblasts (Fig 1B).

*Human RXFP1 mRNA is a direct target of miR-144-3p*—Next, we determined whether miR-144-3p overexpression in Donor and IPF lung fibroblasts can downregulate RXFP1 mRNA and protein levels. We transfected donor and IPF lung fibroblasts with 10 nM miR-144-3p mimic and processed these cells for quantitative RT-PCR and protein detection of RXFP1 (Fig 2). We found by qRT-PCR that donor lung fibroblasts have higher basal levels of RXFP1 mRNA compared to IPF lung fibroblasts ( $p < 0.0016$ , by two-way ANOVA followed by post-hoc testing), confirming our previous findings (7) (Fig 2A). Second, qRT-PCR results showed that RXFP1 is significantly downregulated at mRNA level in donor lung fibroblasts following miR-144-3p overexpression ( $p < 0.0001$ , by two-way ANOVA followed by post-hoc testing) (Fig 2A). These data support the notion that miR-144-3p regulates RXFP1 expression. For specificity of the effect of miR-144-3p on expression of RXFP1, we determined the effect on other relaxin receptor genes RXFP2 and RXFP3. *In silico*, miR-144-3p is

## Regulation of RXFP1 expression in IPF

not predicted to target RXFP2 or RXFP3. Expression of human RXFP1 orthologue RXFP2 was unaffected by miR-144-3p overexpression compared to control mimic based on qRT-PCR data. Expression of RXFP3 was undetectable in donor or IPF lung fibroblasts (Fig 2B). RXFP3 is known to be expressed in central nervous system, but it is not known to be expressed in lungs (20).

We further determined if the effects of miR-144-3p on the RXFP1 were detectable at protein level. Using western blot and densitometry analyses, we found that forced expression of miR-144-3p mimic in donor and IPF lung fibroblasts for 72 hours resulted in a significant repression of RXFP1 protein levels (Fig 2C). Extremely significant effects of tissue origin (IPF versus donor,  $p=0.0006$ , by two-way ANOVA,  $N=3$ ) and miR-144-3p transfection ( $p=0.0004$ , by two-way ANOVA,  $N=3$ ) on RXFP1 expression were detected. A significant interaction between tissue origin and miR-144-3p expression was also detected ( $p<0.03$ ) (Fig 2D).

We previously found that the loss of RXFP1 is also associated with increased expression of the myofibroblast differentiation marker,  $\alpha$ -SMA. To determine if miR-144-3p-mediated loss of RXFP1 is associated with  $\alpha$ -SMA expression, we further analyzed its role in the response to miR-144-3p overexpression. We transfected donor and IPF lung fibroblasts with miR-144-3p or negative control mimic. Western blot and densitometry analysis showed that miR-144-3p overexpression resulted in increased levels of  $\alpha$ -SMA in donor lung fibroblasts; however,  $\alpha$ -SMA levels increased only slightly in IPF lung fibroblasts over baseline. Significant effects of tissue origin (IPF versus Donor,  $p=0.0038$ , by two-way ANOVA,  $N=3$ ) on  $\alpha$ -SMA expression were detected (Fig 2E). No significant interaction was detected.

Next, we determined if RXFP1 protein levels can be inhibited in a dose-dependent manner in donor fibroblasts using a range of mimic concentrations (0, 0.1nM, 1nM, 5nM and 10 nM). Western blot and densitometry analysis show that miR-144-3p mimic decreased RXFP1 with increasing concentrations of miR-144-3p mimic while completely inhibiting expression

of RXFP1 at a concentration of 10 nM in donor lung fibroblasts (Fig 2F). Significant effects of concentration of miR-144-3p treatment on RXFP1 expression were detected (by one-way ANOVA,  $p$ -value for trend 0.0006,  $R^2=0.64$ ) (Fig 2G). While RXFP1 levels decreased,  $\alpha$ -SMA levels increased in a dose-dependent manner (by one-way ANOVA,  $p$ -value for trend 0.0168,  $R^2=0.51$ ) (Fig 2H).

*Anti-miR-144-3p reverses the suppression of RXFP1 in IPF lung fibroblasts*—Having shown that RXFP1 is a targeted gene of miR-144-3p, we next examined whether forced expression of the miR-144-3p inhibitor (antagomiR) in donor and IPF lung fibroblasts would increase RXFP1 expression. As shown in Fig 3A, western blot and densitometry analyses show that the expression of RXFP1 protein was significantly increased by forced expression of the miR-144-3p antagomiR in IPF lung fibroblasts compared to donor lung fibroblasts. Significant effects of tissue origin (IPF versus Donor,  $p=0.007$ , by two-way ANOVA,  $N=3$ ) and miR-144-3p antagomiR treatment ( $p<0.007$ , by two-way ANOVA,  $N=3$ ) on RXFP1 expression were detected (Fig 3B). No significant interaction was detected.

*miR-144-3p directly targets the 3'UTR region of RXFP1 mRNA*—We cloned the 3'-UTR portion of the RXFP1 containing the putative miR-144-3p binding sequence that is complementary to the miR-144-3p seed sequence in pmirGLO luciferase reporter plasmid (Fig 4A). In a parallel experiment, the 3' UTR of RXFP1 complementary to the miR-144-3p seed sequence was mutated and cloned in the same reporter plasmid. Transient transfection of HEK293T cells with the RXFP1-3'-UTR construct along with miR-144-3p mimic (100 nM) led to a significant decrease (~50%) in reporter expression when compared with the empty control vector or with scrambled control mimic (Fig 4B). The luciferase activity of the pmirGLO vector containing the 3' UTR of RXFP1 with a mutated miR-144-3p target site was unaffected by simultaneous transfection with miR-144-3p mimic. These results suggest that miR-144-3p binds to the 3'UTR of RXFP1 to affect mRNA stability. To further



## Regulation of RXFP1 expression in IPF

verify direct targeting in primary human lung fibroblasts, lentiviral constructs carrying the complete RXFP1 3'UTR or miR-144-3p target site mutated 3'UTR sequences were used to transduce donor and IPF fibroblasts. Lung fibroblasts infected with wild type RXFP1 3'UTR construct showed reduced luciferase activity. Those infected with the mutant RXFP1 3'UTR construct showed diminished inhibition of luciferase activity (Fig 4C). These data indicate that endogenous miR-144-3p directly targets RXFP1 and regulates its expression in IPF patient lung fibroblasts.

### DISCUSSION

In this study, we have shown increased expression of miR-144-3p in primary lung fibroblasts derived from IPF patients. Increased expression of miR-144-3p in donor lung fibroblasts, that contain significantly less miR-144-3p at baseline, led to decreased expression of RXFP1. We also show that blockade of miR-144-3p with an antagonist increased RXFP1 expression in IPF fibroblasts. Finally, we have shown that RXFP1 3'UTR luciferase reporter activity is decreased in IPF fibroblasts and that luciferase activity is decreased to a lesser extent containing a mutated miR-144-3p binding site. Together, these data suggest that increased miR-144-3p expression in IPF fibroblasts may, at least in part, explain decreased expression of RXFP1 in IPF fibroblasts.

A previous report has shown that the levels of miR-144-3p are elevated in the biopsy specimens from patients with the bronchiolitis obliterans syndrome (BOS)—a form of airway fibrosis associated with chronic rejection following lung transplant. In this study, forced expression of miR-144-3p mimic increased levels of TGF $\beta$  and *vice versa*, which increased  $\alpha$ -SMA and F-actin levels in MRC5 fibroblasts (21). This, perhaps, indicates a feed-forward loop between miR-144-3p and TGF $\beta$ , that amplifies TGF $\beta$  signaling. However, in the present study TGF $\beta$  had little impact on expression of miR-144-3p, at least in IPF lung fibroblasts. Elevated expression of miR-144-3p in IPF lung fibroblasts may partially explain this observation. Therefore, we suggest that increased levels of miR-144-3p in IPF fibroblasts may be regulated

by a non-TGF $\beta$  mediated pathway. Several previous reports have indicated that miR-144-3p expression is regulated by various stimuli and pathways. Hypoxia has been shown to decrease levels of miR-144-3p in PC3 prostate cancer cells (22). The mechanism underlying increased expression of miR-144-3p levels in IPF fibroblasts is unclear and needs further investigation.

MiR-144-3p is the mature microRNA excised from the precursor miR-144 that is encoded by the miR-144/451 gene cluster on chromosome 17q. Little is known about miR-144-3p in fibrosis, but the precursor microRNA is associated with reduced expression of the Smad signaling repressor transforming growth factor beta (TGF $\beta$ )-induced factor homeobox (TGIF1) (21). The transcription factors GATA1 (23) and GATA4 are thought to positively regulate miR-144 expression in mice (24). PAX4 has also been shown to negatively regulate the miR-144/451 cluster in human epithelial cancer metastasis (25). Another recent report has shown that promoter region of miR-144/451 cluster is composed of 6 potential AP1/C-Jun binding sites with a positive regulatory role in controlling the cluster in human neuroblastoma SH-SY5Y cells (26). Expression of miR-144 has been previously reported to increase during erythropoiesis in mice and humans (27). Expression of the cluster of miR-144/451 has been shown to be significantly low in non-small cell lung cancers (NSCLCs) compared to adjacent normal lung tissue and is also associated with inhibition of cancer cell migration and invasion (28).

In our present study we show that levels of  $\alpha$ -SMA increased dose-dependently with increasing concentrations of miR-144-3p mimic in lung fibroblasts (Fig 2B). These results are consistent with our previous report where we showed that myofibroblast function is critically linked to RXFP1 expression (7). We and others have previously shown that Relaxin (7,29,30) or Relaxin-like agonists blocked the expression of  $\alpha$ -SMA, an effect which is lost in the absence of RXFP1. Relaxin has been shown to inhibit myofibroblast function by inactivating Rho-ROCK pathway (31). Increased expression of  $\alpha$ -SMA in miR-144-

## Regulation of RXFP1 expression in IPF

3p-transfected cells may reflect the lack of relaxin signaling following the loss of RXFP1.

The regulation of RXFP1 in other tissues and other cells may be affected by other microRNAs. The WT lentiviral construct carried the entire 3' UTR sequence of RXFP1, which is predicted to have other potential microRNA target sites in addition to the miR-144-3p site. The mutant construct carried the miR-144-3p mutation only leaving the other target sites intact. We suggest that other unaltered microRNA target sites may explain the mildly-diminished inhibition of luciferase activity in the miR-144-3p mutant transduction experiment compared to the WT construct. Future study is needed to understand the regulation of RXFP1 expression in other tissues and other cells.

In conclusion, we have identified a potential mechanism for regulating expression of RXFP1 in pulmonary fibrosis. Because of the importance of relaxin signaling to fibrosis, we speculate that molecular strategies to increase RXFP1 expression may potentially sensitize fibroblasts, the principal effector cells of fibrosis, to reap the beneficial effects of relaxin. Further study is needed to consider miR-144-3p inhibitors in animal models of fibrosis.

### EXPERIMENTAL PROCEDURES

This study was conducted in accordance with University of Pittsburgh IRB protocol # PRO14120072.

**Bioinformatics**—Prediction of miRNA targets was conducted using miRanda (<http://www.microrna.org/>) (32) and Targetscan 7.0 database ([http://www.targetscan.org/vert\\_71/](http://www.targetscan.org/vert_71/)) (33). The putative sequences of primary microRNAs and the 3'UTR of RXFP1, 2 and 3 were retrieved from the National Center for Biotechnology Information (NCBI) (<http://www.ncbi.nlm.nih.gov>) and ENSEMBLE server (<http://www.ensembl.org>) (34) and miRBase (<http://www.mirbase.org>) (35).

**Primary cell culture**—Primary lung fibroblasts were obtained from Dr. Mauricio Rojas (36). Donor human fibroblasts were

isolated from lungs that appeared to have no injury by histology but were deemed unacceptable for lung transplant. IPF lung fibroblasts were obtained from patients either at explant or at autopsy (37). All fibroblasts were maintained in Dulbecco's modified Eagle's medium supplemented with 10% fetal bovine serum and were used between passages 3 and 6 and used for expression analysis of both RXFP1 and miR-144-3p. MiR-144 antagomiR (Dharmacon) or MirVana miR-144 mimic (Ambion) were used to modulate miR144 levels. RXFP1 protein expression was analyzed using Western blot.

**RNA extraction**—Briefly, total RNAs were extracted from the donor and IPF lung fibroblasts using RNeasy (Qiagen). The RNA samples were reverse transcribed using the High Capacity cDNA Reverse Transcription Kit (Applied Biosystems, Foster City, CA). The product from each reverse transcription reaction was pre-amplified and then the mRNA expression analysis was done by qRT-PCR using ABI TaqMan system (Life Technologies) following the manufacturer's recommended protocol. qRT-PCR primers were purchased from Qiagen (Hsa-PPIA Cat # QT01669542, Hsa-RXFP1 Cat # QT00041720, Hsa-RXFP2 Cat # 00095725, Hsa-RXFP3 Cat # 00210133). PPIA [peptidylprolyl isomerase A (cyclophilin A)] was used as the housekeeping gene for normalization. The global normalization process included the subtraction of the mean  $C_T$  value of the reference set from the  $C_T$  value of each gene of the same sample. Quantification of each sample is shown as  $2^{-\Delta\Delta C_t}$  values.

**TaqMan Real-time RT-PCR for miRNAs**—Small RNAs were isolated from cells following the protocol of the miRNeasy kit (Qiagen). 100-300 ng of RNA sample was reverse-transcribed into cDNA using the TaqMan™ Advanced miRNA cDNA Synthesis Kit (Applied Biosystems). Taqman probes (TaqMan™ microRNA Control Assay for RNU43 and TaqMan™ microRNA Assay for hsa-miR-144) were purchased from Applied Biosystems. Real-time quantitative PCR was performed using the TaqMan Fast Advanced Master Mix (Applied Biosystems). Quantification of each sample is shown as  $2^{-\Delta\Delta C_t}$  values.

## Regulation of RXFP1 expression in IPF

**Western Blotting**—Western blotting was performed as described previously (7). Anti-RXFP1 (ab72159) and Anti- $\alpha$ SMA antibodies (ab7817) were purchased from Abcam. Mouse anti-actin (sc-47778) was from Santa Cruz Biotechnology.

**Design of reporter constructs and Luciferase assays**—Duplexed oligonucleotide pairs (IDT) were designed to contain the predicted miR-144-3p binding region in the RXFP1 3'UTR and when annealed and ligated into the pmirGLO vector, resulted in the miR-144-3p target region in the correct 5' to 3' orientation. The sequences of the duplexes used were as follows: RXFP1-Mir144-WT Duplex (Sense: 5'

AAACTAGCGGCCGCTAGTTCTTCGCAGA GAATACTGTGGGGGTGT; Antisense: 5' CTAGACACCCCCACAGTATTCTCTGCGA AGAACTAGCGGCCGCTAGTTT); RXFP1-Mir144-Mismatch Duplex (Sense: 5' AAACTAGCGGCCGCTAGTTCTTCGCAGA GAATAAATGGGGGTGT, Antisense: 5' CTAGACACCCCCATTTATTCTCTGCGAA GAACTAGCGGCCGCTAGTTT).

Overhangs in the designed duplex were complementary to those generated by *PmeI* and *XbaI* double digestion of the pmirGLO Vector (Promega). *NotI* internal restriction site was designed into the oligo duplex for clone confirmation. pmirGLO Vector was linearized with *PmeI* and *XbaI* to generate overhangs that are complementary to the duplex overhangs. 4ng of duplexed oligonucleotide and 50 ng of linearized vector were ligated using a standard ligation protocol. Ligated pmirGLO was transformed using high-efficiency TOP10 competent cells (NEB). Clones were selected on carbenicillin-containing plates, and then screened for clones containing the duplex by digesting miniprep-purified DNA using the internal *NotI* site. All constructs and mutants were verified by DNA sequencing at the Genomics core facility at University of Pittsburgh. The purified plasmid DNA was used directly in transfections. The resulting constructs were designated as pmirGLO-RXFP1-WT and pmirGLO-RXFP1-MsM. HEK-293T cells in a 24-well plate were transfected with 50 ng of pmirGLO-RXFP1-WT in triplicates and 100 nM control mimic or 100 nM miR-144-3p mimic (Ambion) using Lipofectamine 2000 reagent

(Invitrogen). 24 hrs post-transfection, luciferase assay was performed on the lysates from the cells using a Dual-Luciferase Assay System (E1910, Promega) on Spectramax L instrument. Data were normalized by ratio of firefly and renilla luciferase activities.

**Lentiviral vector transduction in lung fibroblasts**—Lentiviral vectors carrying the 3' UTR region of RXFP1, pLenti-RXFP1-UTR-Luc and its mutant, pLenti-UTR-GFP-Blank, and pLenti-UTR-Luc-Blank were purchased from applied biological materials Inc. (abmgood. BC, Canada). Lentiviral packaging was performed using viral packaging plasmids from the 'ViraPower' kit (Invitrogen) according to the manufacturer's instructions. Filtered viral supernatants were obtained from transfection of 293FT cells according to the manufacturer's protocol. qPCR Lentivirus Titration Kit (abmgood) was used to measure the lentiviral titres according to the manufacturer's instructions. Viral medium was added to complete media in presence of Polybrene (0.8  $\mu$ g/ml) at a multiplicity of infection (MOI) of 5 to infect Donor and IPF lung fibroblasts for 72 hrs. Cells were lysed in passive lysis buffer and dual-luciferase assays were performed as described above. Protein concentrations were measured using Pierce BCA micro assay and were used to normalize luciferase values (RLU/ $\mu$ g; Relative light units/ $\mu$ g of protein).

**Transfection of miRNAs**—Fibroblasts were transfected with miRNA mimics or miRNA inhibitors using HiperFect transfection reagent (Qiagen). Control or miR-144-3p mimics were purchased from Invitrogen. Control or miR-144-3p inhibitors were purchased from Qiagen. Briefly, transfection complexes were generated by mixing 0-10 nM of miRNA mimic/ control mimic or 50 nM inhibitor or control inhibitor, 100  $\mu$ L of DMEM media without serum, and 6 $\mu$ L of HiPerFect Transfection Reagent. After 10-minute incubation at room temperature, the transfection complexes were added drop-wise onto 2 X 10<sup>5</sup> cells per well of a 6-well plate in 2000  $\mu$ L of culture medium with 1% FBS but without antibiotics. Cells were transfected on the day of plating and again on the next day.

## *Regulation of RXFP1 expression in IPF*

*Statistical Analysis*—Analysis of variance (ANOVA) was performed for multiple group comparisons.  $p < 0.05$  was considered statistically significant. Statistical testing is indicated in the text and the figure legends. Data were analyzed using GraphPad Prism7 software.

**Acknowledgements:** None

**Conflict of interest:** Authors declare there is no conflict of interest.

**Author Contributions:** JT, HB, JAD, and SBS conducted experiments and analyzed the results. JT, JAD, SBS conducted qRT-PCR and western blot experiments. HB conducted the luciferase experiments. DJK, JT, and YZ conceived and planned experiments. HB, JT, JAD, SBS, YZ and DJK wrote the manuscript.



## REFERENCES

1. Navaratnam, V., Fleming, K. M., West, J., Smith, C. J., Jenkins, R. G., Fogarty, A., and Hubbard, R. B. (2011) The rising incidence of idiopathic pulmonary fibrosis in the U.K. *Thorax* **66**, 462-467
2. Raghu, G., Lynch, D., Godwin, J. D., Webb, R., Colby, T. V., Leslie, K. O., Behr, J., Brown, K. K., Egan, J. J., Flaherty, K. R., Martinez, F. J., Wells, A. U., Shao, L., Zhou, H., Pedersen, P. S., Sood, R., Montgomery, A. B., and O'Riordan, T. G. (2014) Diagnosis of idiopathic pulmonary fibrosis with high-resolution CT in patients with little or no radiological evidence of honeycombing: secondary analysis of a randomised, controlled trial. *Lancet Respir Med* **2**, 277-284
3. Chihal, H. J., and Espey, L. L. (1973) Utilization of the relaxed symphysis pubis of guinea pigs for clues to the mechanism of ovulation. *Endocrinology* **93**, 1441-1445
4. Bennett, R. G. (2009) Relaxin and its role in the development and treatment of fibrosis. *Transl Res* **154**, 1-6
5. Samuel, C. S., Zhao, C., Bathgate, R. A., Bond, C. P., Burton, M. D., Parry, L. J., Summers, R. J., Tang, M. L., Amento, E. P., and Tregear, G. W. (2003) Relaxin deficiency in mice is associated with an age-related progression of pulmonary fibrosis. *FASEB J* **17**, 121-123
6. Samuel, C. S., Mookerjee, I., Masterson, R., Tregear, G. W., and Hewitson, T. D. (2005) Relaxin regulates collagen overproduction associated with experimental progressive renal fibrosis. *Ann N Y Acad Sci* **1041**, 182-184
7. Tan, J., Tedrow, J. R., Dutta, J. A., Juan-Guardela, B., Nouraie, M., Chu, Y., Trejo Bittar, H., Ramani, K., Biswas, P. S., Veraldi, K. L., Kaminski, N., Zhang, Y., and Kass, D. J. (2016) Expression of RXFP1 Is Decreased in Idiopathic Pulmonary Fibrosis. Implications for Relaxin-based Therapies. *Am J Respir Crit Care Med* **194**, 1392-1402
8. Dehghan, F., Muniandy, S., Yusof, A., and Salleh, N. (2014) Sex-steroid regulation of relaxin receptor isoforms (RXFP1 & RXFP2) expression in the patellar tendon and lateral collateral ligament of female WKY rats. *Int J Med Sci* **11**, 180-191
9. Moore, X. L., Su, Y., Fan, Y., Zhang, Y. Y., Woodcock, E. A., Dart, A. M., and Du, X. J. (2014) Diverse regulation of cardiac expression of relaxin receptor by alpha1- and beta1-adrenoceptors. *Cardiovasc Drugs Ther* **28**, 221-228
10. Mazella, J., Tang, M., and Tseng, L. (2004) Disparate effects of relaxin and TGFbeta1: relaxin increases, but TGFbeta1 inhibits, the relaxin receptor and the production of IGFBP-1 in human endometrial stromal/decidual cells. *Hum Reprod* **19**, 1513-1518
11. Fallowfield, J. A., Hayden, A. L., Snowdon, V. K., Aucott, R. L., Stutchfield, B. M., Mole, D. J., Pellicoro, A., Gordon-Walker, T. T., Henke, A., Schrader, J., Trivedi, P. J., Princivalle, M., Forbes, S. J., Collins, J. E., and Iredale, J. P. (2014) Relaxin modulates human and rat hepatic myofibroblast function and ameliorates portal hypertension in vivo. *Hepatology* **59**, 1492-1504
12. Snowdon, V. K., Lachlan, N. J., Hoy, A. M., Hadoke, P. W., Semple, S. I., Patel, D., Mungall, W., Kendall, T. J., Thomson, A., Lennen, R. J., Jansen, M. A., Moran, C. M., Pellicoro, A., Ramachandran, P., Shaw, I., Aucott, R. L., Severin, T., Saini, R., Pak, J., Yates, D., Dongre, N., Duffield, J. S., Webb, D. J., Iredale, J. P., Hayes, P. C., and Fallowfield, J. A. (2017) Serelaxin as a potential treatment for renal dysfunction in cirrhosis: Preclinical evaluation and results of a randomized phase 2 trial. *PLoS Med* **14**, e1002248
13. Montgomery, R. L., Yu, G., Latimer, P. A., Stack, C., Robinson, K., Dalby, C. M., Kaminski, N., and van Rooij, E. (2014) MicroRNA mimicry blocks pulmonary fibrosis. *EMBO Mol Med* **6**, 1347-1356
14. Liu, G., Friggeri, A., Yang, Y., Milosevic, J., Ding, Q., Thannickal, V. J., Kaminski, N., and Abraham, E. (2010) miR-21 mediates fibrogenic activation of pulmonary fibroblasts and lung fibrosis. *J Exp Med* **207**, 1589-1597



*Regulation of RXFP1 expression in IPF*

15. Christmann, R. B., Wooten, A., Sampaio-Barros, P., Borges, C. L., Carvalho, C. R., Kairalla, R. A., Feghali-Bostwick, C., Ziemek, J., Mei, Y., Goummih, S., Tan, J., Alvarez, D., Kass, D. J., Rojas, M., de Mattos, T. L., Parra, E., Stifano, G., Capelozzi, V. L., Simms, R. W., and Lafyatis, R. (2016) miR-155 in the progression of lung fibrosis in systemic sclerosis. *Arthritis Res Ther* **18**, 155
16. Pandit, K. V., Corcoran, D., Yousef, H., Yarlagadda, M., Tzouveleakis, A., Gibson, K. F., Konishi, K., Yousem, S. A., Singh, M., Handley, D., Richards, T., Selman, M., Watkins, S. C., Pardo, A., Ben-Yehudah, A., Bouros, D., Eickelberg, O., Ray, P., Benos, P. V., and Kaminski, N. (2010) Inhibition and role of let-7d in idiopathic pulmonary fibrosis. *Am J Respir Crit Care Med* **182**, 220-229
17. Mizuno, K., Matakai, H., Seki, N., Kumamoto, T., Kamikawaji, K., and Inoue, H. (2017) MicroRNAs in non-small cell lung cancer and idiopathic pulmonary fibrosis. *J Hum Genet* **62**, 57-65
18. Chen, S., Puthanveetil, P., Feng, B., Matkovich, S. J., Dorn, G. W., 2nd, and Chakrabarti, S. (2014) Cardiac miR-133a overexpression prevents early cardiac fibrosis in diabetes. *J Cell Mol Med* **18**, 415-421
19. Yong, K. L., Callander, G. E., Bergin, R., Samuel, C. S., and Bathgate, R. A. (2013) Development of human cells with RXFP1 knockdown using retroviral delivery of microRNA against human RXFP1. *Ital J Anat Embryol* **118**, 10-12
20. Bathgate, R. A., Ivell, R., Sanborn, B. M., Sherwood, O. D., and Summers, R. J. (2005) Receptors for relaxin family peptides. *Ann N Y Acad Sci* **1041**, 61-76
21. Xu, Z. P., Ramachandran, S., Gunasekaran, M., Zhou, F. Y., Trulock, E., Kreisel, D., Hachem, R., and Mohanakumar, T. (2015) MicroRNA-144 dysregulates the transforming growth factor-beta signaling cascade and contributes to the development of bronchiolitis obliterans syndrome after human lung transplantation. *J Heart Lung Transpl* **34**, 1154-1162
22. Gu, H., Liu, M., Ding, C., Wang, X., Wang, R., Wu, X., and Fan, R. (2016) Hypoxia-responsive miR-124 and miR-144 reduce hypoxia-induced autophagy and enhance radiosensitivity of prostate cancer cells via suppressing PIM1. *Cancer Med* **5**, 1174-1182
23. Dore, L. C., Amigo, J. D., Dos Santos, C. O., Zhang, Z., Gai, X., Tobias, J. W., Yu, D., Klein, A. M., Dorman, C., Wu, W., Hardison, R. C., Paw, B. H., and Weiss, M. J. (2008) A GATA-1-regulated microRNA locus essential for erythropoiesis. *Proc Natl Acad Sci U S A* **105**, 3333-3338
24. Zhang, X. W., Wang, X. H., Zhu, H. Y., Zhu, C., Wang, Y. G., Pu, W. T., Jegga, A. G., and Fan, G. C. (2010) Synergistic effects of the GATA-4-mediated miR-144/451 cluster in protection against simulated ischemia/reperfusion-induced cardiomyocyte death. *J Mol Cell Cardiol* **49**, 841-850
25. Zhang, J., Qin, X., Sun, Q., Guo, H., Wu, X., Xie, F., Xu, Q., Yan, M., Liu, J., Han, Z., and Chen, W. (2015) Transcriptional control of PAX4-regulated miR-144/451 modulates metastasis by suppressing ADAMs expression. *Oncogene* **34**, 3283-3295
26. Cheng, C., Li, W., Zhang, Z., Yoshimura, S., Hao, Q., Zhang, C., and Wang, Z. (2013) MicroRNA-144 is regulated by activator protein-1 (AP-1) and decreases expression of Alzheimer disease-related a disintegrin and metalloprotease 10 (ADAM10). *J Biol Chem* **288**, 13748-13761
27. Kim, M., Tan, Y. S., Cheng, W. C., Kingsbury, T. J., Heimfeld, S., and Civin, C. I. (2015) MIR144 and MIR451 regulate human erythropoiesis via RAB14. *Br J Haematol* **168**, 583-597
28. Pan, H. L., Wen, Z. S., Huang, Y. C., Cheng, X., Wang, G. Z., Zhou, Y. C., Wang, Z. Y., Guo, Y. Q., Cao, Y., and Zhou, G. B. (2015) Down-regulation of microRNA-144 in air pollution-related lung cancer. *Sci Rep* **5**, 14331
29. Masterson, R., Hewitson, T. D., Kelynack, K., Martic, M., Parry, L., Bathgate, R., Darby, I., and Becker, G. (2004) Relaxin down-regulates renal fibroblast function and promotes matrix remodelling in vitro. *Nephrol Dial Transplant* **19**, 544-552

*Regulation of RXFP1 expression in IPF*

30. Hossain, M. A., Man, B. C., Zhao, C., Xu, Q., Du, X. J., Wade, J. D., and Samuel, C. S. (2011) H3 relaxin demonstrates antifibrotic properties via the RXFP1 receptor. *Biochemistry* **50**, 1368-1375
31. Huang, X., Gai, Y., Yang, N., Lu, B., Samuel, C. S., Thannickal, V. J., and Zhou, Y. (2011) Relaxin regulates myofibroblast contractility and protects against lung fibrosis. *Am J Pathol* **179**, 2751-2765
32. Betel, D., Koppal, A., Agius, P., Sander, C., and Leslie, C. (2010) Comprehensive modeling of microRNA targets predicts functional non-conserved and non-canonical sites. *Genome Biol* **11**, R90
33. Agarwal, V., Bell, G. W., Nam, J. W., and Bartel, D. P. (2015) Predicting effective microRNA target sites in mammalian mRNAs. *Elife* **4**
34. Aken, B. L., Ayling, S., Barrell, D., Clarke, L., Curwen, V., Fairley, S., Fernandez Banet, J., Billis, K., Garcia Giron, C., Hourlier, T., Howe, K., Kahari, A., Kokocinski, F., Martin, F. J., Murphy, D. N., Nag, R., Ruffier, M., Schuster, M., Tang, Y. A., Vogel, J. H., White, S., Zadissa, A., Flicek, P., and Searle, S. M. (2016) The Ensembl gene annotation system. *Database (Oxford)* **2016**
35. Kozomara, A., and Griffiths-Jones, S. (2014) miRBase: annotating high confidence microRNAs using deep sequencing data. *Nucleic Acids Res* **42**, D68-73
36. Romero, Y., Bueno, M., Ramirez, R., Alvarez, D., Sembrat, J. C., Goncharova, E. A., Rojas, M., Selman, M., Mora, A. L., and Pardo, A. (2016) mTORC1 activation decreases autophagy in aging and idiopathic pulmonary fibrosis and contributes to apoptosis resistance in IPF fibroblasts. *Aging Cell*
37. Tan, J., Tedrow, J. R., Nouraie, M., Dutta, J. A., Miller, D. T., Li, X., Yu, S., Chu, Y., Juan-Guardela, B., Kaminski, N., Ramani, K., Biswas, P. S., Zhang, Y., and Kass, D. J. (2017) Loss of Twist1 in the Mesenchymal Compartment Promotes Increased Fibrosis in Experimental Lung Injury by Enhanced Expression of CXCL12. *J Immunol* **198**, 2269-2285

## Regulation of RXFP1 expression in IPF

### FOOTNOTES

This work was supported in whole or part by National Institutes of Health Grant R01 HL126990 to DJK and by the Simmons fund.

§ These authors contributed equally to this work.

The abbreviations used are: RXFP1, relaxin/insulin-like family peptide receptor 1; TGF, transforming growth factor; DMEM, Dulbecco's modified Eagle's medium; GPCR, G-protein coupled receptor; ANOVA, analysis of variance; IPF, Idiopathic pulmonary fibrosis; SSc, Scleroderma.

### FIGURE LEGENDS

**FIGURE 1.** miR-144-3p expression is elevated in IPF fibroblasts. (A) The seed region of miR-144-3p that targets the 3' UTR of RXFP1. (B) Donor and IPF lung fibroblasts were stimulated with and without TGF $\beta$ , and RNA was isolated for qPCR. Significantly more miR-144-3p was detected in IPF lung fibroblasts compared to donor controls. Significant effects of disease were detected ( $p < 0.05$ ) by two-way ANOVA.

**FIGURE 2.** RXFP1 mRNA is a direct target of miR-144-3p. (A) Donor and IPF lung fibroblasts were treated with miR-144-3p mimic or scrambled control. RNA was isolated and processed for qPCR for RXFP1. Significantly higher basal levels of RXFP1 mRNA were detected in donor fibroblasts. Treatment of donor fibroblasts with the miR-144-3p significantly decreased RXFP1 expression ( $p < 0.0016$ , by two-way ANOVA,  $N = 3$ ). Data are expressed as mean  $\pm$  S.E.M., normalized to the internal standard control gene PPIA (B) miR-144-3p mimic had no effect on expression levels of RXFP2 both in fibroblasts from lungs of IPF patients or from donor lungs. RXFP3 levels were undetectable in both donor and IPF lung fibroblasts (C) Donor and IPF lung fibroblasts were transfected with 10 nM miR-144-3p mimic or control. miR-144-3p mimic significantly decreased RXFP1 expression in both donor and IPF lung fibroblasts whereas  $\alpha$ -SMA expression significantly increased in IPF lung fibroblasts. Samples were analyzed by Western Blotting. Signals were analyzed with the C-DIGIT imager, quantified with Image Studio<sup>TM</sup> Software and normalized to  $\beta$ -actin (D) Image Studio<sup>TM</sup> quantification of band intensity of RXFP1 were normalized to  $\beta$ -actin. Data are expressed as mean  $\pm$  S.E.M., normalized to  $\beta$ -actin. Significant effects of tissue origin (IPF  $\nu$  Donor,  $p = 0.0006$ , by two-way ANOVA,  $N = 3$ ) and miR-144-3p transfection (IPF  $\nu$  Donor,  $p = 0.0004$ , by two-way ANOVA,  $N = 3$ ) on RXFP1 expression were observed. Significant interaction between tissue origin and miR-144-3p transfection was detected ( $p < 0.03$ ). (E) Image Studio<sup>TM</sup> quantification of band intensity of  $\alpha$ -SMA were normalized to  $\beta$ -actin. Significant effects of tissue origin (IPF  $\nu$  Donor,  $p = 0.0038$ , by two-way ANOVA,  $N = 3$ ) on  $\alpha$ -SMA expression were detected. No significant interaction was detected. (F) Donor lung fibroblasts were transfected with increasing concentration of miR-144-3p (0.1, 1, 5, and 10 nM). miR-144-3p mimic decreased the expression of RXFP1 and upregulated the expression of  $\alpha$ -SMA in a dose-dependent manner. (G) Image Studio<sup>TM</sup> quantification of band intensities of RXFP1 normalized to  $\beta$ -actin are presented. miR-144-3p significantly repressed RXFP1 expression in donor lung fibroblasts in a dose dependent fashion (data analyzed by one-way ANOVA,  $p$ -value for trend 0.0006,  $R^2 = 0.640$ ). (H) Densitometry of  $\alpha$ -SMA were normalized to  $\beta$ -actin is presented.  $\alpha$ -SMA levels increased in a dose-dependent fashion (by one-way ANOVA,  $p$ -value for trend 0.0168,  $R^2 = 0.51$ ).

**FIGURE 3.** miR-144-3p antagomiR reversed the suppression of RXFP1 in IPF lung fibroblasts. (A) Donor and IPF lung fibroblasts were transfected with 50 nM miR-144-3p antagomiR or control. miR-144-3p antagomiR significantly increased expression of RXFP1

## Regulation of RXFP1 expression in IPF

in IPF lung fibroblasts compared to donor lung fibroblasts. (B) Image Studio™ quantification of band intensity of RXFP1 was normalized to  $\beta$ -actin. Significant effects of tissue origin (IPF *v* Donor,  $p=0.007$ , by two-way ANOVA, N=3) and miR-144-3p antagomiR treatment ( $p<0.007$ , by two-way ANOVA, N=3) on RXFP1 expression were detected. No significant interaction was detected.

**FIGURE 4.** miR-144-3p directly targets the 3'UTR region of RXFP1 mRNA. (A) Depiction of pmirGLO dual-luciferase reporter construct for WT 3'UTR region of RXFP1 seed region and the mutation (B) 293T cells were plated 24 hours prior to transfection. Cells were then co-transfected with 50 ng of either pmirGLO vector carrying WT 3' UTR of RXFP1 or mutated 3' UTR of RXFP1 with and without 100 nM miR-144-3p mimic or control mimic. miR-144-3p significantly repressed the luciferase activity of the reporter containing the WT 3' UTR of RXFP1, whereas mutated construct was insensitive in 293T cells. Luciferase activity was measured using *Renilla* luciferase as an internal control. Mean  $\pm$  S.D, N=3 (C) When a lentiviral luciferase reporter construct carrying WT 3' UTR of RXFP1 was used to transduce both Donor and IPF lung fibroblasts, there was a reduction in luciferase activity compared to mutated 3'UTR of RXFP1. Protein concentrations were measured using Pierce™ BCA protein kit assay and were used to normalize luciferase values. Mean  $\pm$  S.D, N=3.



*Regulation of RXFP1 expression in IPF*

Figure 1

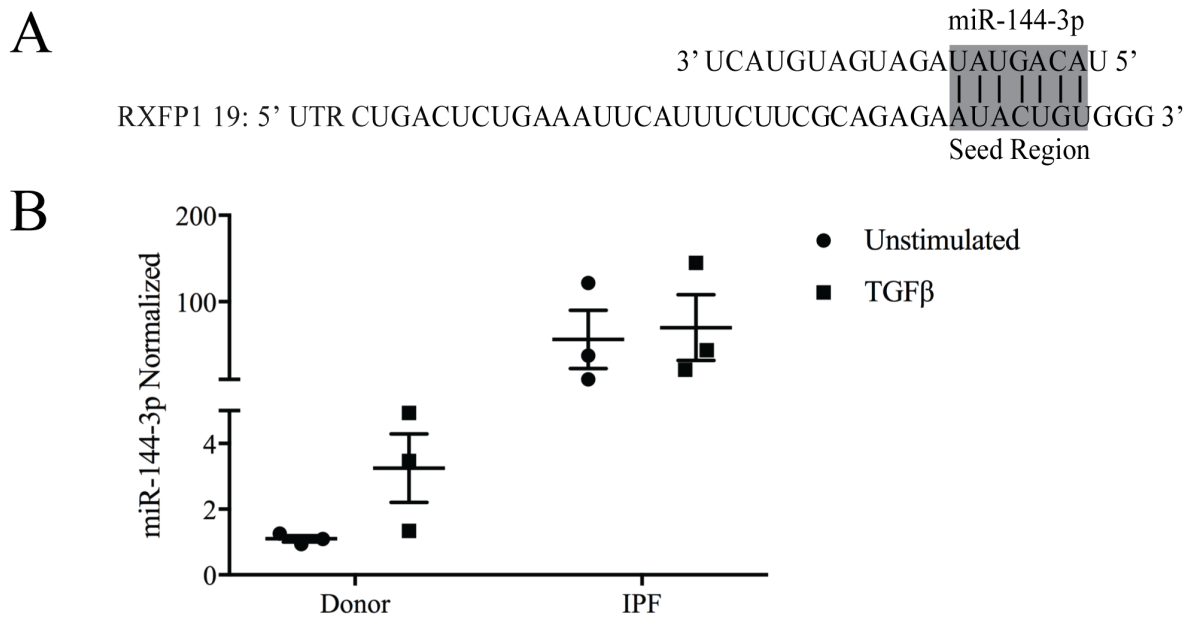

Figure 2

## Regulation of RXFP1 expression in IPF

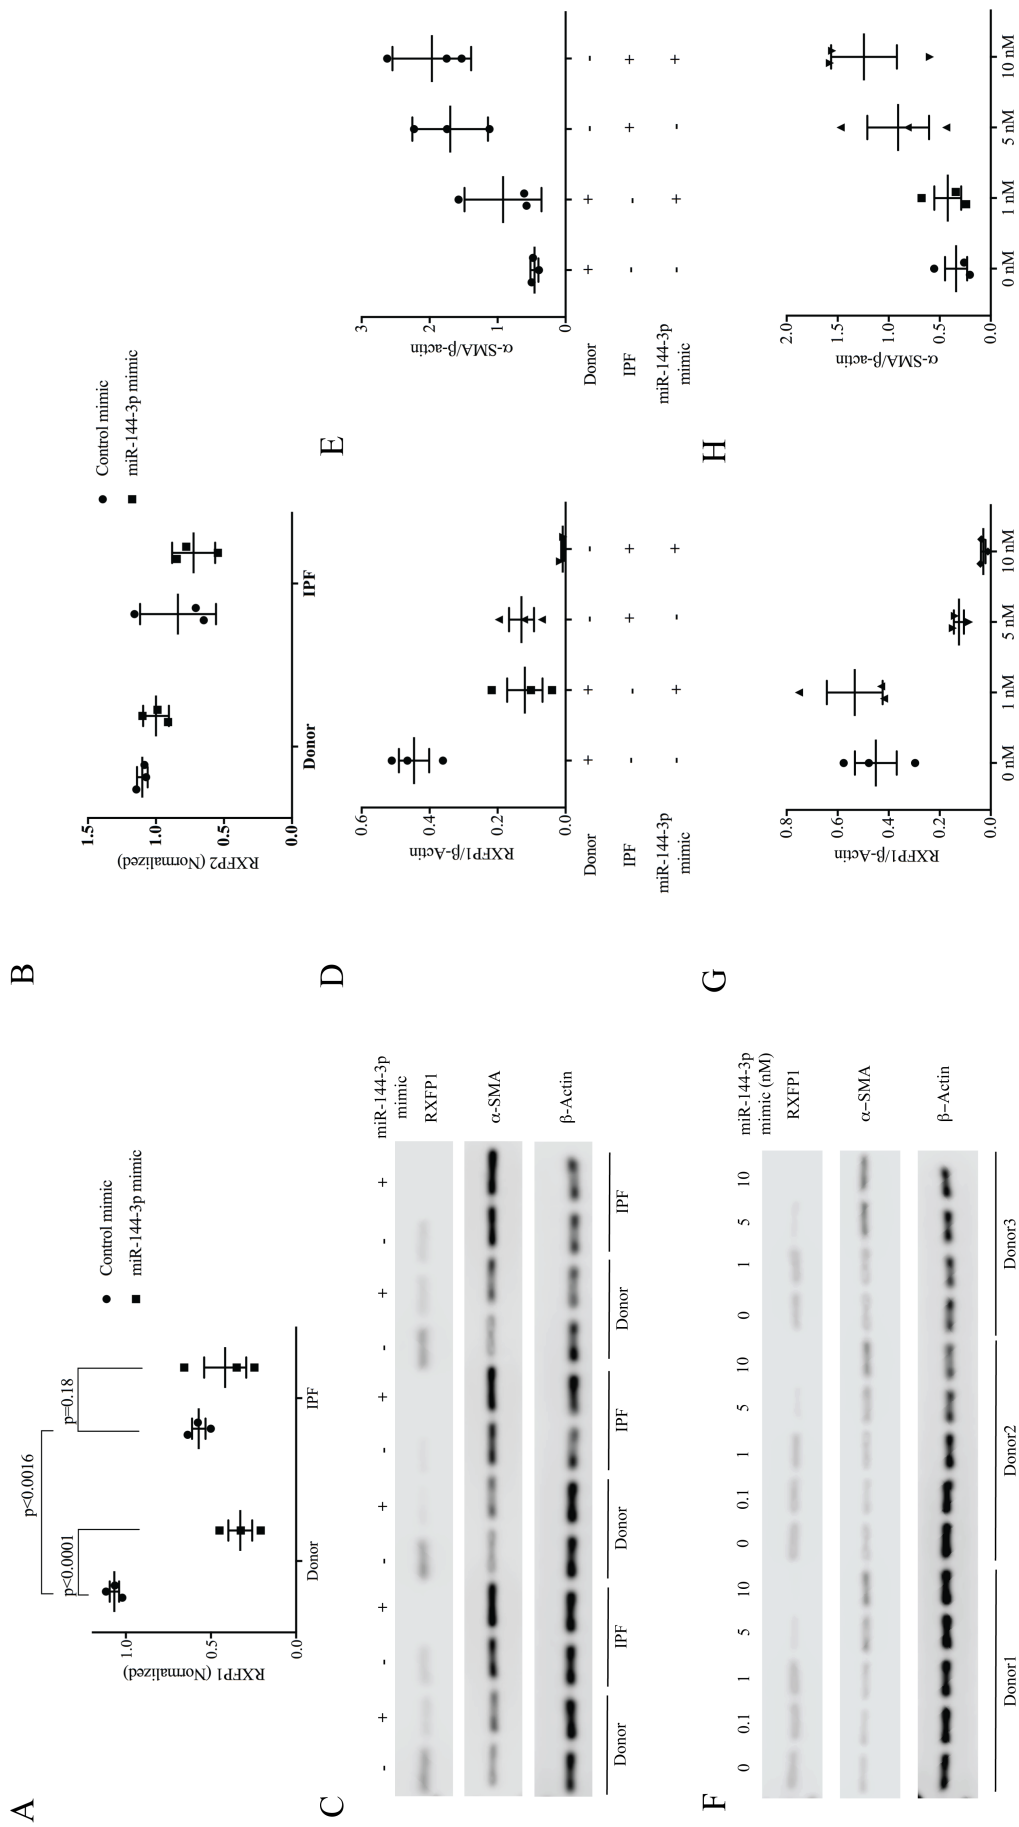

*Regulation of RXFP1 expression in IPF*

Figure 3

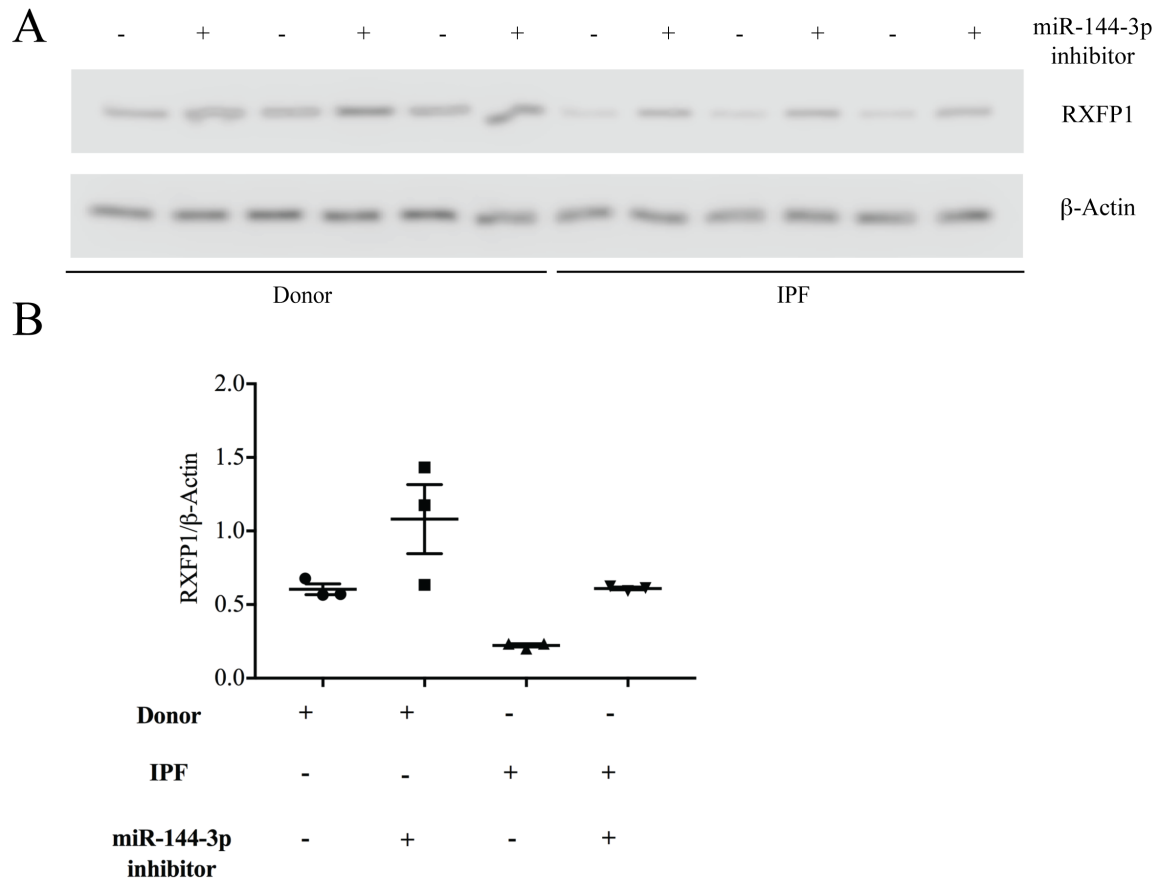

Regulation of RXFP1 expression in IPF

Figure 4

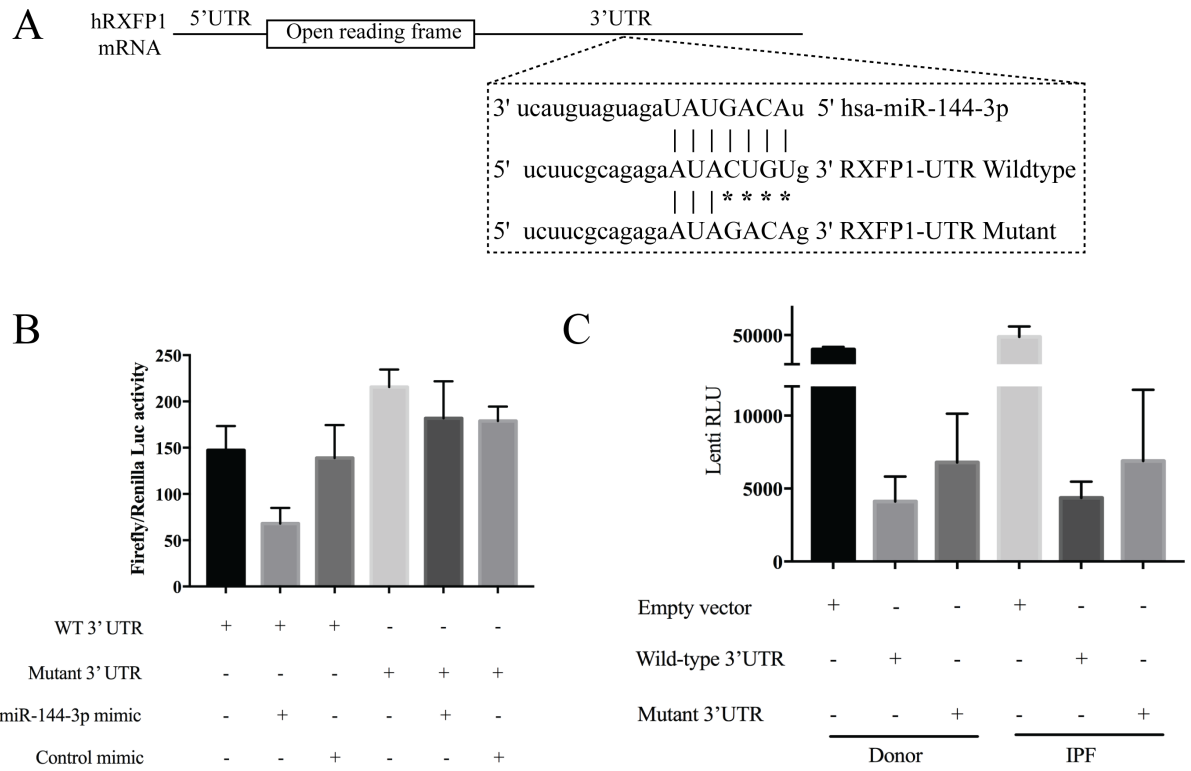

Source: http://www.biorxiv.org/content/10.1101/159459v1.full.pdf
